# Supplementary material
Source: HighWire-hosted journal article supplement (https://www.cmajopen.ca/highwire/filestream/81019/field_highwire_adjunct_files/1/open-2016-0001-2-at.pdf)
Supplement: open-2016-0001-2-at.pdf [file open-2016-0001-2-at.pdf]

## Appendix 2 (as supplied by the authors): Interview guide

We gathered data for this project using semi-structured interviews. In the table below we have listed the research areas addressed along with examples of questions.

Research Areas:

Examples of Interview Questions:

|                                                                                                                                                    |                                                                                                                         |
|----------------------------------------------------------------------------------------------------------------------------------------------------|-------------------------------------------------------------------------------------------------------------------------|
| <i>What is the experience of community members in terms of interacting with medical students or residents from Southern Ontario</i>                | 1) Tell me about your experience with health care in Kenora                                                             |
|                                                                                                                                                    | 2) Have you encountered students or residents traveling from Southern Ontario?                                          |
|                                                                                                                                                    | 3) What was your experience/interaction like with these students/residents?                                             |
| <i>Do medical elective tourists historically provide culturally safe care to the community</i>                                                     | 1) In your experience, were residents/students adequately prepared to serve the community's needs?                      |
|                                                                                                                                                    | 2) Did they appreciate the diversity within the community?                                                              |
|                                                                                                                                                    | 3) Are you aware of any negative experiences between students/residents coming from Southern Ontario and the community? |
| <i>What should be incorporated into a formal curriculum for medical elective tourists wishing to travel to Kenora or other similar communities</i> | 1) What are the essential qualities of Kenora that people from Southern Ontario should appreciate prior to coming?      |
|                                                                                                                                                    | 2) Are there any books/articles they should read that would help them to understand the community?                      |
